# Supplementary material for: Novel methodology for anodic stripping voltammetric sensing of heavy-metal ions using Ti3C2Tx nanoribbons
Source: Royal Society of Chemistry journal article supplement (doi:10.1039/d1cc02560k), 2021-01-01
Supplement: d1cc02560k1.pdf [file d1cc02560k1.pdf]

## Supporting information

### **Novel methodology for anodic stripping voltammetric sensing of heavy-metal ions using $\text{Ti}_3\text{C}_2\text{T}_x$ nanoribbons**

Yinhui Yi,<sup>a,d</sup> Yuzhi Ma,<sup>a</sup> Fengxiang Ai,<sup>a</sup> Yixuan Xia,<sup>a</sup> Huiyu Lin<sup>c</sup> and Gangbing Zhu<sup>\*a,b,c</sup>

<sup>a</sup> School of the Environment and Safety Engineering, Jiangsu University, Zhenjiang, 212013, P.R.China

<sup>b</sup> State Key Laboratory of Electroanalytical Chemistry, Changchun Institute of Applied Chemistry, Chinese Academy of Sciences, Changchun, Jilin 130022, P.R.China

<sup>c</sup> Fujian Key Laboratory of Functional Marine Sensing Materials, Ocean College, Minjiang University, P.R.China

<sup>d</sup> Key Laboratory of Chemical Biology and Traditional Chinese Medicine Research (Hunan Normal University), Ministry of Education, Changsha, Hunan 410081, P.R.China.

---

\*Corresponding author. Tel.: +86 511 88791800; fax.: +86 511 88791800.  
E-mail address: zhgb1030@ujs.edu.cn

## **Experimental section**

### **Reagents and apparatus**

CdCl<sub>2</sub>·2.5H<sub>2</sub>O, hydrofluoric acid (HF, ≥40%), KOH, KCl, HgSO<sub>4</sub>, NaCl, ZnCl<sub>2</sub>, CoCl<sub>2</sub>·6H<sub>2</sub>O, FeCl<sub>3</sub>, CaCl<sub>2</sub>, MgCl<sub>2</sub>, CuCl<sub>2</sub>·2H<sub>2</sub>O, MnCl<sub>2</sub>·4H<sub>2</sub>O and PbC<sub>4</sub>H<sub>6</sub>O<sub>4</sub>·3H<sub>2</sub>O were purchased from Aladdin Biotechnology Co., Ltd (Shanghai, China). Ti<sub>3</sub>AlC<sub>2</sub> (99%) powder was purchased by Forsman Technology Company (Beijing). Phosphate buffer solution (PBS, 0.1 M) was chosen as the supporting electrolyte, which was prepared with NaH<sub>2</sub>PO<sub>4</sub>, Na<sub>2</sub>HPO<sub>4</sub> and KCl. Aqueous solution used throughout was prepared with ultrapure water which was obtained via a Millipore purification system. All the electrochemical tests were carried out at CHI 660E Electrochemical Workstation. If no specific instructions were given, the electrochemical tests were performed in PBS (0.1 M, pH 5.0).

### **Preparation of Ti<sub>3</sub>C<sub>2</sub>T<sub>x</sub> NR**

The preparation methodology procedure of Ti<sub>3</sub>C<sub>2</sub>T<sub>x</sub> NR is illustrated in Scheme 1. Firstly, the as-purchased Ti<sub>3</sub>AlC<sub>2</sub> (1.0 g) was slowly added into HF solution (40.0%, 30.0 mL) and gently stirred for 24 h at 40 °C to obtain Ti<sub>3</sub>C<sub>2</sub>T<sub>x</sub> NS solution. The Ti<sub>3</sub>C<sub>2</sub>T<sub>x</sub> NS product was collected after centrifugation (5000 rpm for 10 minutes) and washed with water until the pH value of supernatant reached ~7.0, then it was dried at 60 °C in vacuum. Secondly, Ti<sub>3</sub>C<sub>2</sub>T<sub>x</sub> NS powder (0.2 g) was added into KOH solution (6.0 mol·L<sup>-1</sup>, 25.0 mL) under continuous stirring under N<sub>2</sub> atmosphere for ~100 h at 25 °C. And the final Ti<sub>3</sub>C<sub>2</sub>T<sub>x</sub> NR product was collected after washing and dried.

### **Construction of electrochemical sensor for Cd<sup>2+</sup>**

Before further modification, GCE was successively polished with 0.3 and 0.05 μM alumina powder and rinsed with ultrapure water. After the sequential sonication in acetone and

ultrapure water, GCE was dried under  $N_2$  gas. Via casting a definite of  $Ti_3C_2T_x$  NR suspension (1.0 mg/mL) onto the GCE surface and drying with infrared lamp,  $Ti_3C_2T_x$  NR/GCE was obtained. For comparison, bare GCE,  $Ti_3C_2T_x$  NS/GCE, graphene oxide modified GCE (GO/GCE), carbon black modified GCE (CB/GCE) and oxidized carbon nanotube modified GCE (O-MWCNTs/GCE) was prepared via the same procedure.

### **Electrochemical Detection of $Cd^{2+}$**

The electrochemical sensing of  $Cd^{2+}$  in PBS solution was divided into the following two continuous steps: (1)  $Ti_3C_2T_x$  NR/GCE was immersed into PBS containing  $Cd^{2+}$  with varying concentrations by stirring within a definite accumulation time. The purpose of this step is that the electrodeposition and self-reduction of  $Cd^{2+}$  to form  $Cd^0$  on the modified electrodes surface; and (2) the electrochemical detection of  $Cd^{2+}$  was accomplished by DPV in blank PBS solution.

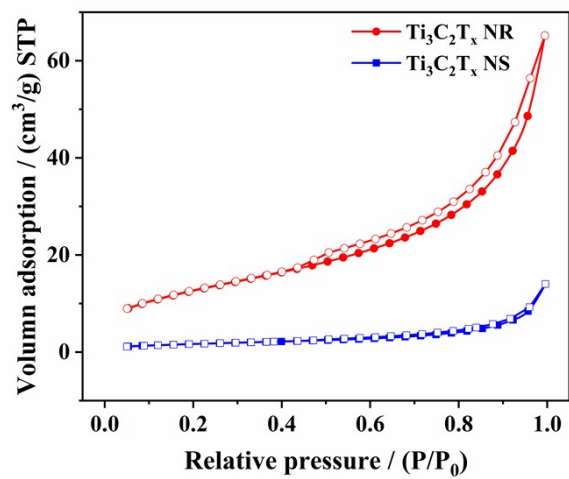

**Figure S1.** N<sub>2</sub> adsorption–desorption of Ti<sub>3</sub>C<sub>2</sub>T<sub>x</sub> NS and Ti<sub>3</sub>C<sub>2</sub>T<sub>x</sub> NR.

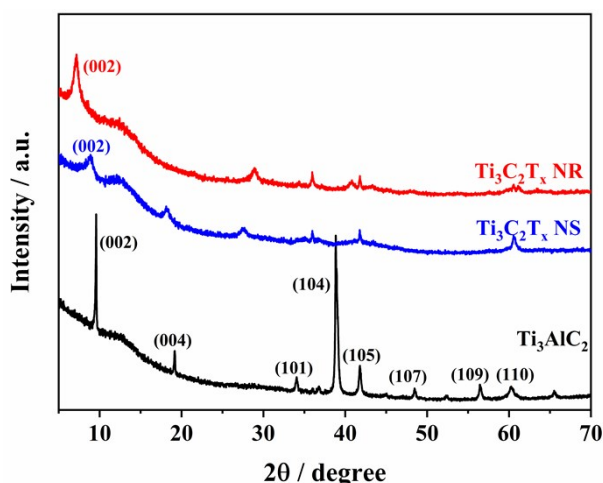

**Figure S2.** XRD patterns of  $\text{Ti}_3\text{AlC}_2$ ,  $\text{Ti}_3\text{C}_2\text{T}_x$  NS and  $\text{Ti}_3\text{C}_2\text{T}_x$  NR.

The crystallographic structural changes of the pristine  $\text{Ti}_3\text{AlC}_2$ ,  $\text{Ti}_3\text{C}_2\text{T}_x$  NS and  $\text{Ti}_3\text{C}_2\text{T}_x$  NR were investigated by the XRD spectra. As shown in Figure S2, XRD of the  $\text{Ti}_3\text{AlC}_2$  (MAX phase) pattern was in accordance with the standard spectrum.<sup>1</sup> After the etching process, the most intense diffraction peak e.g., (104), located at  $2\theta = 39.0^\circ$ , almost disappears, indicating the removal of the Al interlayer. Meanwhile, the (002) peak of  $\text{Ti}_3\text{C}_2\text{T}_x$  is broadened and shifts to a low diffraction angle, indicating the substantial expansion of the interlayer distance from  $\text{Ti}_3\text{AlC}_2$  to  $\text{Ti}_3\text{C}_2\text{T}_x$  NS, which we expected. When  $\text{Ti}_3\text{C}_2\text{T}_x$  NS was treated with KOH solution via continuous stirring, the  $2\theta$  angle of (002) peak was shifted from  $8.80^\circ$  for  $\text{Ti}_3\text{C}_2\text{T}_x$  NS to  $7.08^\circ$  for  $\text{Ti}_3\text{C}_2\text{T}_x$  NR coupled with a stronger intensity. This was demonstrative of the expansion of interlayer spacing since the rapid adsorption and intercalation of  $\text{K}^+$  and  $\text{OH}^-$  ions into multi layers of  $\text{Ti}_3\text{C}_2\text{T}_x$  caused the substantial expansion of interlayer distance.

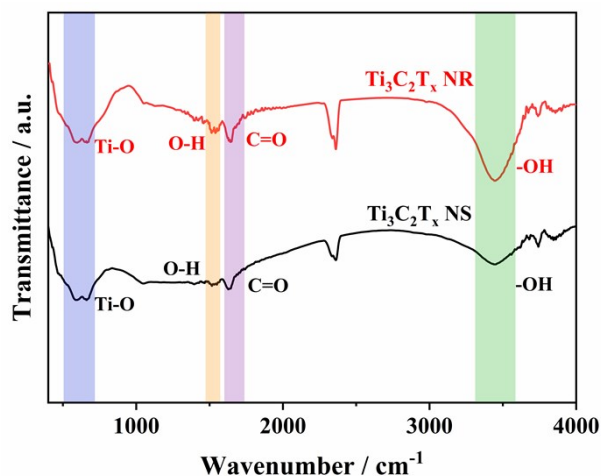

**Figure S3.** FTIR spectra of  $\text{Ti}_3\text{C}_2\text{T}_x$  NS and  $\text{Ti}_3\text{C}_2\text{T}_x$  NR.

FT-IR spectroscopy was used to examine the phase and structural properties of obtained materials.

The FT-IR spectroscopy spectra (Figure S3) showed several peaks corresponding to vibrations of major surface functional groups; these included Ti-O ( $\sim 650\text{cm}^{-1}$ ), O-H ( $\sim 1510\text{ cm}^{-1}$ ), C=O ( $\sim 1680\text{ cm}^{-1}$ ) and O-H ( $\sim 3500\text{ cm}^{-1}$ ) respectively.

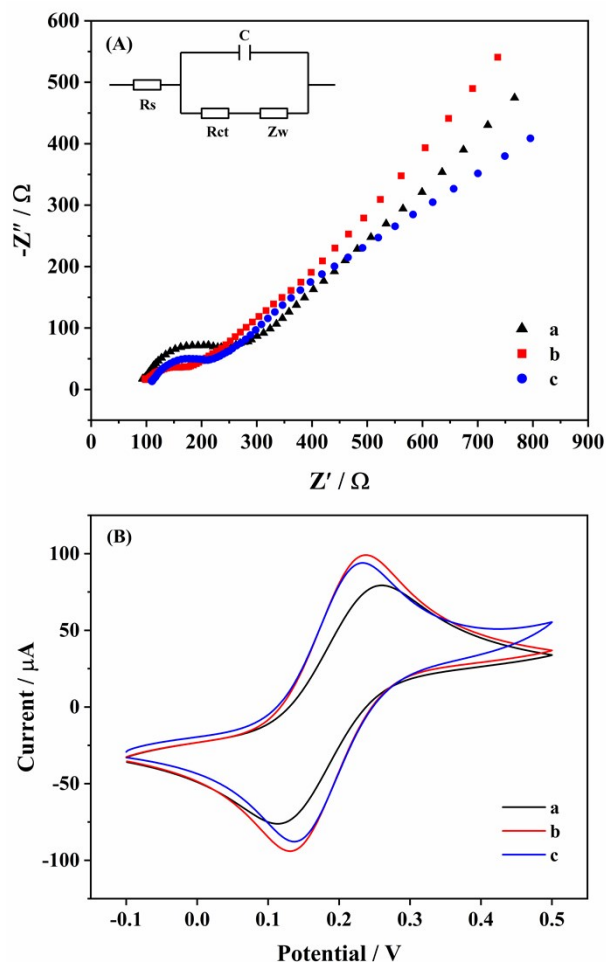

**Figure S4.** EIS plots (A) and cyclic voltammograms (B) of the bare GCE (a),  $Ti_3C_2T_x$  NS/GCE (b) and  $Ti_3C_2T_x$  NR/GCE (c) in 0.1 M KCl aqueous solution containing 5.0 mM  $[Fe(CN)_6]^{3-/4-}$ . The inset (A) is Equivalent circuit for fitting the plots.

The Nyquist plots of GCE,  $Ti_3C_2T_x$  NS/GCE and  $Ti_3C_2T_x$  NR/GCE was measured in 5.0 mM  $[Fe(CN)_6]^{3-/4-}$  solution which contains 0.1 mol  $L^{-1}$  KCl. Via fitting the impedance data using Randles equivalent circuit (inset of Figure S4A), the corresponding charge transfer resistance ( $R_{ct}$ ) values of GCE,  $Ti_3C_2T_x$  NS/GCE and  $Ti_3C_2T_x$  NR/GCE are 198.1, 85.0 and 125.7  $\Omega$ , respectively. The resistance values decreased in  $Ti_3C_2T_x$  NS/GCE owing to the fast electron transfer property of  $Ti_3C_2T_x$ . As for  $Ti_3C_2T_x$  NR/GCE, the resistance values have increased to a certain extent. This is due

to the electrostatic repulsion between  $[\text{Fe}(\text{CN})_6]^{3-/4-}$  group and the negatively charged hydroxyl group. Meanwhile, the electrode preparation was also studied by cyclic voltammetry (CV) using  $[\text{Fe}(\text{CN})_6]^{3-/4-}$  as a probe (Figure S4B). As shown in Figure S4B, a pair of well-defined redox peaks appears at GCE. After modifying with  $\text{Ti}_3\text{C}_2\text{T}_x$  NS, the peak currents enhanced remarkably at  $\text{Ti}_3\text{C}_2\text{T}_x$  NS/GCE and  $\Delta E_p$  becomes smaller, suggesting that  $\text{Ti}_3\text{C}_2\text{T}_x$  MXene has high electronic conductivity and surface area. As for  $\text{Ti}_3\text{C}_2\text{T}_x$  NR/GCE, the redox peak currents decreased, consistent with its the resistance value.



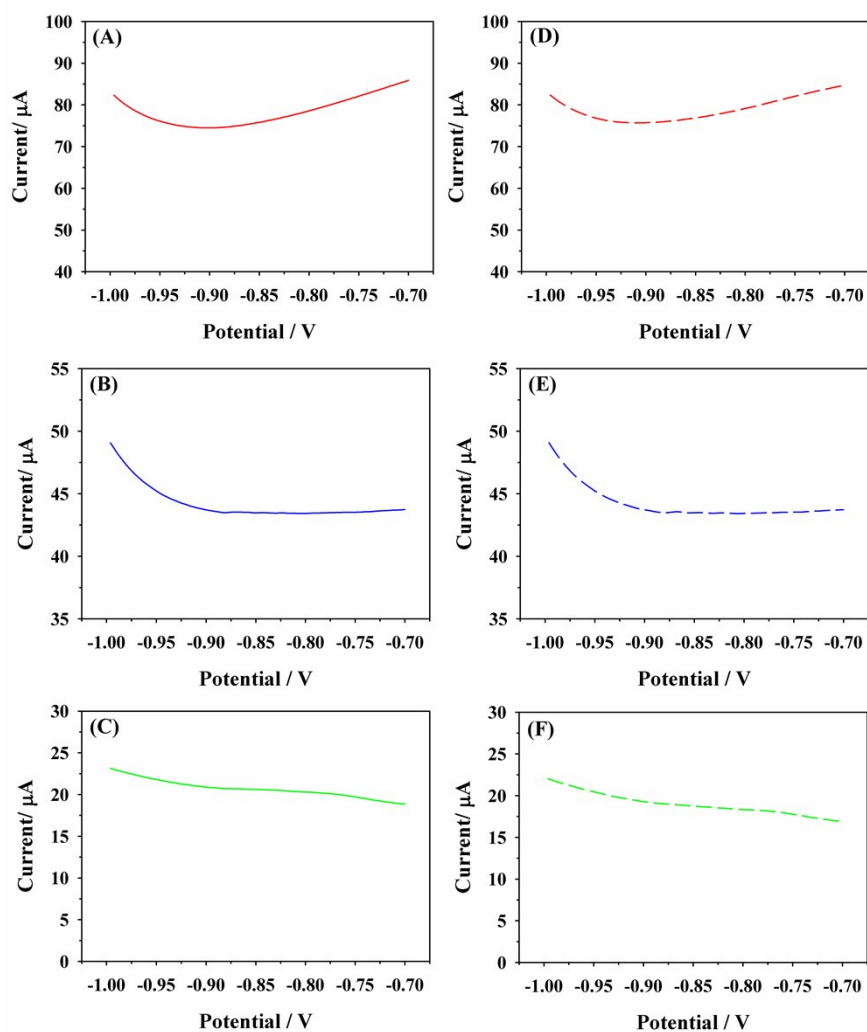

**Figure S5.** DPV curves of the GO/GCE (A), CB/GCE (B) and oxidized MWCNTs/GCE (C) after immersing in 2.0 μM Cd<sup>2+</sup> solution; the background current response of GO/GCE (D), CB/GCE (E) and oxidized MWCNTs/GCE (F).

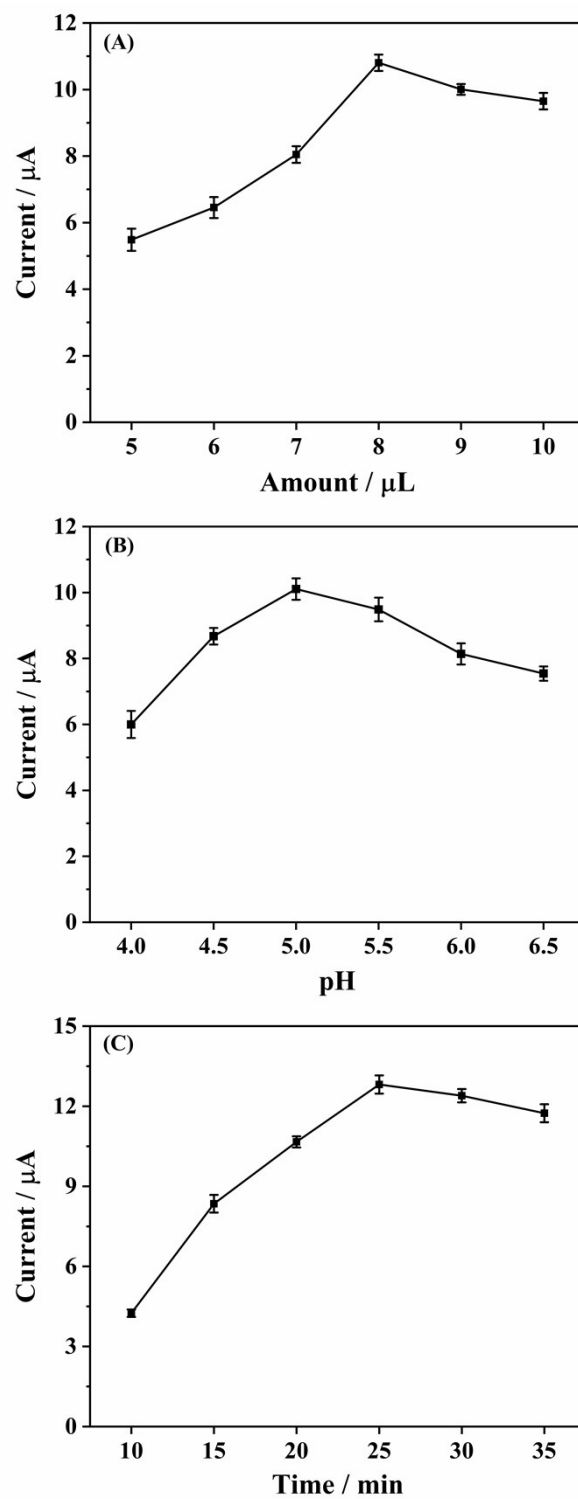

**Figure S6.** The influence of amount of Ti<sub>3</sub>C<sub>2</sub>T<sub>x</sub> NR (A), the pH value of PBS (B) and accumulation time(C) on the DPV peak currents of Cd<sup>2+</sup> at Ti<sub>3</sub>C<sub>2</sub>T<sub>x</sub> NR/GCE in 0.1 M PBS.

Figure S6A shows the effects of the amount of Ti<sub>3</sub>C<sub>2</sub>T<sub>x</sub> NR (5.0 to 10.0 μL) on the GCE surface towards the response current, the achieved results show that the optimized parameter

was 8.0  $\mu\text{L}$ . Then, the influence of the pH value of PBS on the oxidation peak currents of  $\text{Cd}^0$  was examined from 4.0 to 6.5 (Figure S6B), it can be found the peak currents increase with the increase of pH from 4.0 to 5.0, which can be attributed to the protonation of active groups at lower pH values and the decreasing their absorption ability to  $\text{Cd}^{2+}$ . However, the peak current begins to decrease when pH value increases from 5.0 to 6.5, which may be attributed to the formation of metal ions hydroxide compounds and the inhibition of their accumulation. Therefore, the pH value of PBS at 5.0 was selected throughout the work. Furthermore, the effect of self-reduction time towards the DPV current was studied also (Figure S6C). It's noted the DPV currents increase with the increase of the time, and the maximum was obtained at 25 min, suggesting that the longer time is benefit for the accumulation and self-reduction of  $\text{Cd}^{2+}$  on the  $\text{Ti}_3\text{C}_2\text{T}_x$  NR/GCE surface. However, when the time exceeds 25 min, the peak current decreased slightly resulted from the active sites saturation; hence 25 min was used for the detection of  $\text{Cd}^{2+}$ .

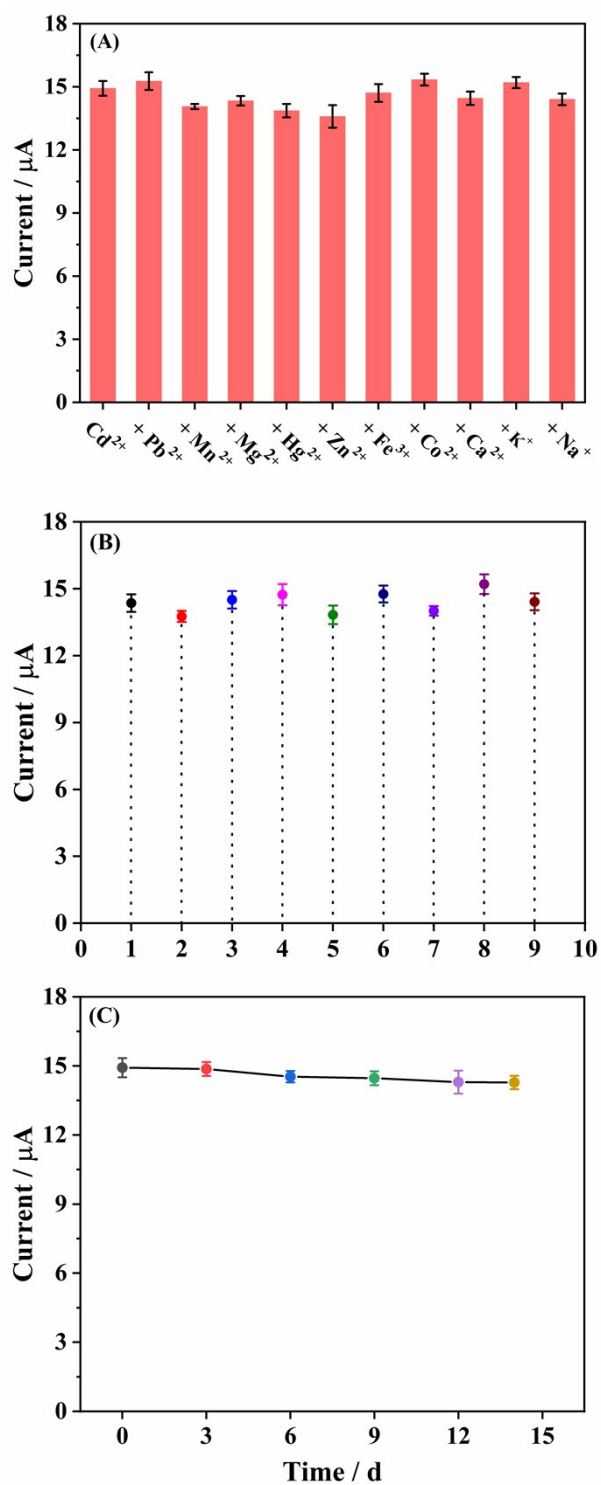

**Figure S7.** The peak current values of  $1.0 \mu\text{M Cd}^{2+}$  containing various inorganic ions (A); the peak current values of  $1.0 \mu\text{M Cd}^{2+}$  at 9 independently fabricated electrodes (B); the stability test of the fabricated electrodes in two weeks (C).

**Table S1.** Comparison of  $Ti_3C_2T_x$  NR/GCE and the reported electrodes over the last three years for electrochemically detecting  $Cd^{2+}$ .

| *Electrodes                                          | Electroreduction |         | Linear range<br>/ $\mu M$ | LOD / nM | Sensitivity<br>$\mu A / \mu M$ | Refer.    |
|------------------------------------------------------|------------------|---------|---------------------------|----------|--------------------------------|-----------|
|                                                      | Potential/ V     | Time/ s |                           |          |                                |           |
| GA-UiO-66-NH <sub>2</sub> /GCE                       | -1.30            | 250     | 0.01-1.5                  | 9.0      | 0.2716                         | 2         |
| trGNO/Fc-NH <sub>2</sub> -UiO-66/GCE                 | -1.20            | 310     | 0.01-2.0                  | 8.5      | /                              | 3         |
| PG/GCE                                               | -0.90            | 1600    | 0.25-5.5                  | 15.0     | -7.291                         | 4         |
| a-g-C <sub>3</sub> N <sub>4</sub> /GCE               | -1.5             | 150     | 0.05-0.7                  | 3.9      | 22.668                         | 5         |
| Nafion/BiSn@C/GCE                                    | -1.2             | 300     | 0.01-30.0                 | 3.0      | 2.495                          | 6         |
| Nano-PPCPE                                           | -1.0             | 300     | 0.1-3.0                   | 78.0     | 2.73                           | 7         |
| NH <sub>2</sub> -MIL-88(Fe)-rGO/GCE                  | -1.0             | 240     | 0.005-0.3                 | 4.9      | 190.36                         | 8         |
| ZJU-77/Nafion/GCE                                    | -1.4             | 140     | 0.0-0.53                  | 1.0      | 30.26                          | 9         |
| Sb <sub>2</sub> O <sub>3</sub> /MWCNTs/CPE           | -1.0             | 600     | 0.72-1.04                 | 100.0    | 26.9                           | 10        |
| CB/PLA printed electrode                             | -1.0             | 200     | 0.27-2.4                  | 26.0     | 20.6                           | 11        |
| NH <sub>2</sub> -MIL-88(Fe)-rGO/GCE                  | -1.00            | 240     | 0.005-0.3                 | 4.9      | 190.36                         | 8         |
| F@SnO <sub>2</sub> /T/RGO/GCE                        | -0.60            | 120     | 0.02-2.0                  | 5.0      | 9.0                            | 12        |
| NG/GCE                                               | -1.10            | 300     | 0.05-9.0                  | 30.0     | 2.842                          | 13        |
| MgFe-LDH/graphene/GCE                                | -1.10            | 180     | 0.1-1.0                   | 4.7      | 26.15                          | 14        |
| GSH@Fe <sub>3</sub> O <sub>4</sub> /MGCE             | -1.4             | 210     | 0.0044-0.89               | 1.5      | 8.40752                        | 15        |
| Ti <sub>3</sub> C <sub>2</sub> T <sub>x</sub> NR/GCE | No requirement   |         | 0.005-3.0                 | 0.96     | 14.508                         | This work |

\*GA, graphene aerogel; UiO-66-NH<sub>2</sub>, the metal-organic framework crystal; a-g-C<sub>3</sub>N<sub>4</sub>, activated graphitic carbon nitride; BiSn@C, carbon supported BiSn alloy nanoparticles; nano-PPCPE, nano-porous pseudo carbon paste electrode; MWCNTs, multiwall carbon nanotube; CPE, carbon paste electrodes; CB, carbon black; PLA, polylactic acid; trGNO, thermally reduced graphene oxide; Fc-NH<sub>2</sub>-UiO-66, ferrocenecarboxylic acid functionalized metal-organic framework; PG, poly(L-glutamic acid) and graphene oxide composite; NH<sub>2</sub>-MIL-88(Fe), a kind of metal-organic frameworks; rGO, reduced graphene oxide; F, fluorine; T, 2-aminobenzothiazole and 2-amino-4-thiazoleacetic acid; RGO, reduced graphene oxide; NG, N-doped graphene; MgFe-LDH, hierarchical MgFe-layered double hydroxide microspheres; GSH@Fe<sub>3</sub>O<sub>4</sub>, glutathione functionalized iron oxide nanocomposite; MGCE, magnetic glassy carbon electrode.

## References

1. X. Wang, Y. Zhou, *J. Mater. Chem.*, 2002, **12**, 455-460.
2. M. Lu, Y. Deng, Y. Luo, J. Lv, T. Li, J. Xu, S.W. Chen, J. Wang, *Anal. Chem.*, 2019, **91**, 888-895.
3. X. Wang, Y. Qi, Y. Shen, Y. Yuan, L. Zhang, C. Zhang, Y. Sun, *Sens. Actuators, B*, 2020, **310**, 127756.
4. J. Song, P. Ran, F. Mo, J. Wu, Y. Fu, *J. Electrochem. Soc.*, 2019, **166**, B426-B431.

5. Y. Liu, G.-L. Wen, X. Chen, R. Weerasooriya, Z.-Y. Hong, L.-C. Wang, Z.-J. Huang, Y.-C. Wu, *Anal. Bioanal. Chem.*, 2020, **412**, 343-353.
6. Y. Chen, D. Zhang, D. Wang, L. Lu, X. Wang, G. Guo, *Talanta*, 2019, **202**, 27-33.
7. Y. Liu, T. Li, C. Ling, Z. Chen, Y. Deng, N. He, *Chin. Chem. Lett.*, 2019, **30**, 2211-2215.
8. S. Duan, Y. Huang, *J. Electroanal. Chem.*, 2017, **807**, 253-260.
9. Y. Li, T. Xia, J. Zhang, Y. Cui, B. Li, Y. Yang, G. Qian, *J. Solid State Chem.*, 2019, **275**, 38-42.
10. T.L. Hai, L.C. Hung, T.T.B. Phuong, B.T.T. Ha, B.-S. Nguyen, T.D. Hai, V.-H. Nguyen, *Microchem. J.*, 2020, **153**, 104456.
11. D.P. Rocha, A.L. Squissato, S.M. da Silva, E.M. Richter, R.A.A. Munoz, *Electrochim. Acta*, 2020, **335**, 135688.
12. X. Cui, X. Fang, H. Zhao, Z. Li, H. Ren, *Colloids Surf., A*, 2018, **546**, 153-162.
13. H. Xing, J. Xu, X. Zhu, X. Duan, L. Lu, W. Wang, Y. Zhang, T. Yang, *J. Electroanal. Chem.*, 2016, **760**, 52-58.
14. Y. Ma, Y. Wang, D. Xie, Y. Gu, X. Zhu, H. Zhang, G. Wang, Y. Zhang, H. Zhao, *Chem. Eng. J.*, 2018, **347**, 953-962.
15. M. Baghayeri, A. Amiri, B. Maleki, Z. Alizadeh, O. Reiser, *Sens. Actuators, B*, 2018, **273**, 1442-1450.

**Table S2.** The determination of Cd<sup>2+</sup> in real samples

| Samples    | Spiked ( $\mu\text{M}$ ) | Found ( $\mu\text{M}$ ) | Recovery (%) | RSD (%) |
|------------|--------------------------|-------------------------|--------------|---------|
| Tap water  | 0.5                      | 0.47                    | 94.0         | 4.24    |
|            | 1.0                      | 1.03                    | 103          | 3.56    |
|            | 2.0                      | 1.89                    | 94.5         | 2.31    |
| Lake water | 0.5                      | 0.53                    | 106          | 4.69    |
|            | 1.0                      | 1.07                    | 107          | 3.44    |
|            | 2.0                      | 2.13                    | 106.5        | 4.15    |
